# Supplementary material for: Low sensitivity of a heavily-calcified coccolithophore under increasing CO 2 : the case study of Helicosphaera carteri
Source: Copernicus journal article supplement (doi:10.5194/egusphere-2024-2681), 2024-10-09

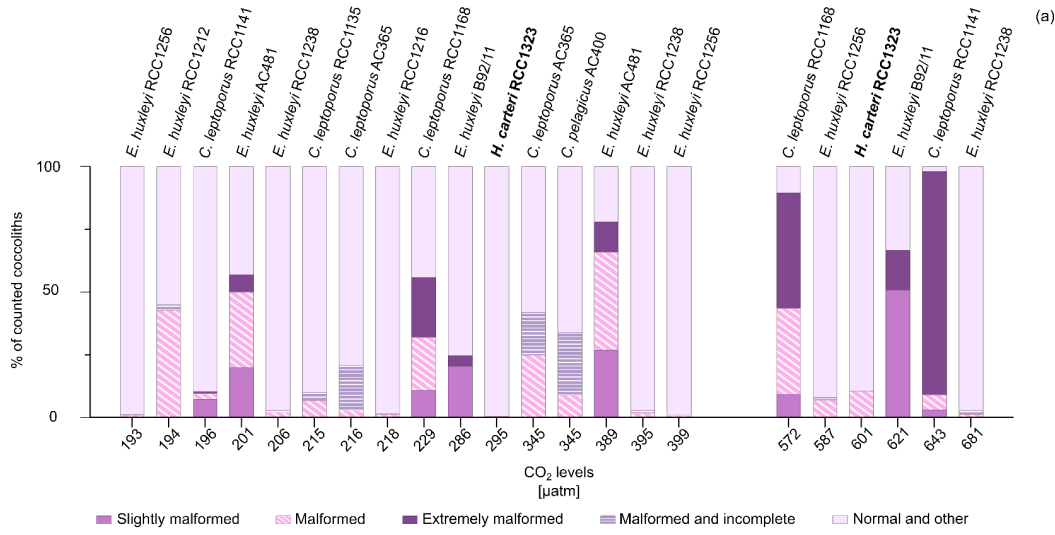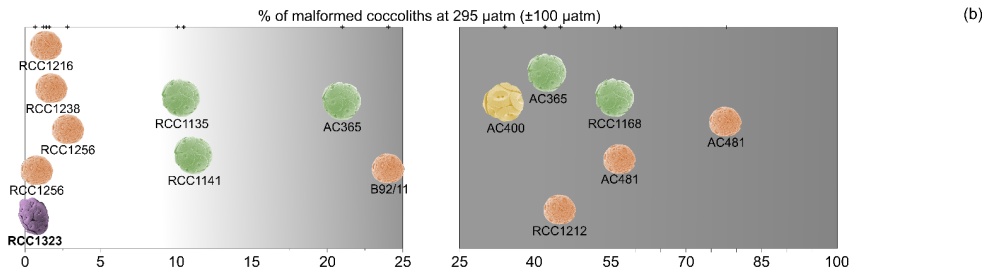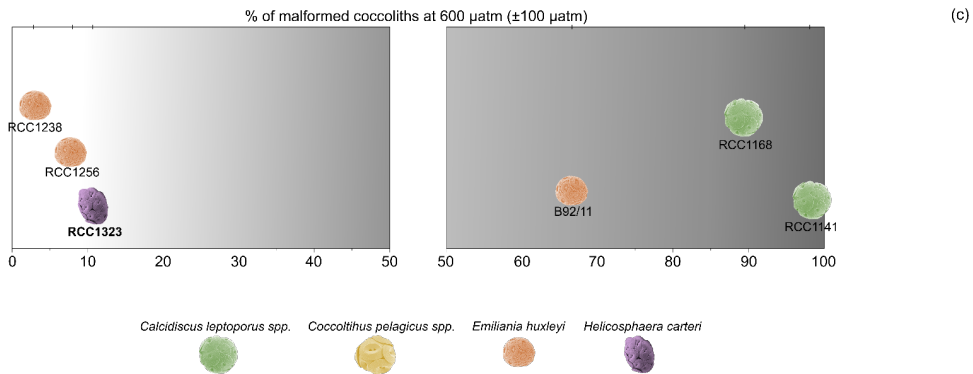

Supplement: Supplementary file [file egusphere-2024-2681-AC1-supplement.pdf]
